# Supplementary material for: Solution-processed nickel oxide passivation on large-area silicon electrodes for efficient photoelectrochemical water splitting
Source: Royal Society of Chemistry journal article supplement (doi:10.1039/d4ra06774f), 2024-01-01
Supplement: d4ra06774f1.pdf [file d4ra06774f1.pdf]

## Supplementary Information

### **Solution-Processed Nickel Oxide Passivation on Large-Area Silicon Electrodes for Efficient Photoelectrochemical Water Splitting**

Da-Young Lee<sup>†</sup>, Hye-Min Shin<sup>†</sup>, and Myung-Han Yoon<sup>\*</sup>

*School of Materials Science and Engineering, Gwangju Institute of Science and Technology,  
123 Cheomdangwagi-ro, Buk-gu, Gwangju 61005, Republic of Korea*

<sup>\*</sup>Corresponding author: Prof. Myung-Han Yoon (mhyoon@gist.ac.kr)

<sup>†</sup>These authors equally contributed to this research.

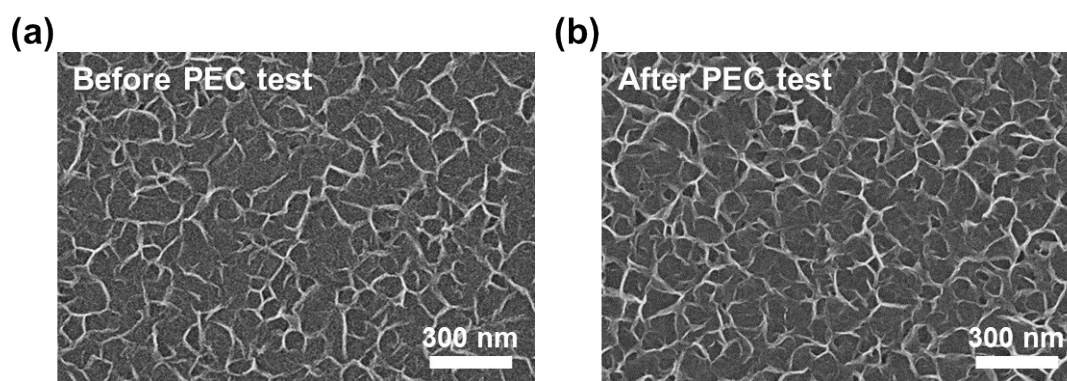

**Figure S1.** SEM images of NiO nanostructures on n-Si substrates (CBD for 3 min, thermal annealing at 300 °C) (a) before and (b) after PEC measurements.
